1

## Regulation of the PKD2 channel function by TACAN

2 Xiong Liu<sup>1#</sup>, Rui Zhang<sup>2#</sup>, Mohammad Fatehi<sup>3#</sup>, Yifang Wang<sup>2</sup>, Wentong Long<sup>3</sup>, Rui  
3 Tian<sup>2</sup>, Xiaoling Deng<sup>2</sup>, Ziyi Weng<sup>2</sup>, Qinyi Xu<sup>1</sup>, Peter E Light<sup>3</sup>, Jingfeng Tang<sup>2</sup>, Xing-  
4 Zhen Chen<sup>1\*</sup>

5 <sup>1</sup>Membrane Protein Disease Research Group, Department of Physiology, Faculty of Medicine  
6 and Dentistry, University of Alberta, T6G 2H7, Edmonton, AB, Canada

7 <sup>2</sup>National "111" Center for Cellular Regulation and Molecular Pharmaceutics, Hubei University  
8 of Technology, Wuhan, Hubei 430086, China

9 <sup>3</sup>Department of Pharmacology, Faculty of Medicine and Dentistry, University of Alberta, T6G  
10 2H7, Edmonton, Alberta, Canada.

11 \*Correspondence: Xing-Zhen Chen ([xzchen@ualberta.ca](mailto:xzchen@ualberta.ca))

12 #These authors contributed equally.

## 13 **Abstract**

14 Autosomal dominant polycystic kidney disease (ADPKD) is caused by mutations in membrane  
15 receptor PKD1 or cation channel PKD2. TACAN (also named TMEM120A), recently reported  
16 as an ion channel in neuron cells for mechano and pain sensing, is also distributed in diverse  
17 non-neuronal tissues such as kidney, heart and intestine, suggesting its involvement in other  
18 functions. In this study, we found that TACAN is in complex with PKD2 in native renal cell  
19 lines. Using the two-electrode voltage clamp in *Xenopus* oocytes we found that TACAN  
20 inhibited the channel activity of PKD2 gain-of-function mutant F604P. The first and last  
21 transmembrane domains of TACAN were found to interact with the PKD2 C- and N-terminal  
22 portions, respectively. We showed that the TACAN N-terminus acted as a blocking peptide and  
23 that TACAN inhibits the PKD2 function through the PKD2/TACAN binding. By patch clamping  
24 in mammalian cells, we found that TACAN inhibits both the single channel conductance and  
25 open probability of PKD2 and mutant F604P. PKD2 co-expressed with TACAN, but not PKD2  
26 alone, exhibited pressure sensitivity. Furthermore, we also found that TACAN aggravates PKD2-  
27 dependent tail curvature and pronephric cysts in larval zebrafish, in support of the *in vitro*  
28 inhibitory effects of TACAN. In summary, this study revealed that TACAN acts as a PKD2  
29 inhibitor and mediates mechano sensitivity of the PKD2/TACAN channel complex.

30 **Keywords:** ADPKD, TMEM120A, electrophysiology, mechano sensitivity, *Xenopus* oocyte,  
31 mammalian cell, zebrafish, CRISPR/Cas9

## 32 Introduction

33 Autosomal dominant polycystic kidney disease (ADPKD), characterized by accumulation of  
34 multiple cysts in both kidneys, is one of the most common human genetic diseases (Harris and  
35 Torres, 2009). Extrarenal pathologies associated with ADPKD may include hepatic and  
36 pancreatic cysts, cerebral and intracranial aneurysms, and cardiovascular abnormalities (Luciano  
37 and Dahl, 2014). Although mutations in PKD1 or PKD2 or their dosage alterations account for  
38 ADPKD, their biophysical and physiological functions are not well understood (Douguet et al.,  
39 2019). PKD1 (also called polycystin-1) is a receptor-like membrane protein with 11  
40 transmembrane (TM) segments (S1-S11) and a large extracellular N-terminus while PKD2 (also  
41 called polycystin-2 or transient receptor potential polycystin-2 (TRPP2)) is a Ca<sup>2+</sup>-permeable  
42 cation channel belonging to the TRP superfamily of cation channels possessing six TMs (S1-S6)  
43 and pore domain S5-loop-S6 (Bergmann et al., 2018). PKD2 forms homotetramers but can also  
44 for heterotetramers to fulfill different functions (Cheng et al., 2010). As revealed by cryo-  
45 electron microscopy (EM) PKD1/PKD2 formed heterotetramers at 1:3 stoichiometry (Su et al.,  
46 2018). Through functional studies, we found that PKD1/PKD2 has higher Ca<sup>2+</sup> permeability than  
47 homomeric PKD2 (Wang et al., 2019) but mechanisms of how PKD1 contributes to the  
48 selectivity filter and pore gate in PKD1/PKD2 remains elusive. It was reported that the  
49 extracellular N-terminus of PKD1 functions as an activation ligand of the PKD1/PKD2 complex  
50 (Ha et al., 2020). Additional reports demonstrated that PKD2 interacts with other ion channels  
51 including TRPV4 (Köttgen et al., 2008), TRPC1 (Kobori et al., 2009) and Piezo1 (Peyronnet et  
52 al., 2013) to form channel complexes with distinct biophysical properties. How PKD2 is  
53 regulated by interacting partners remains largely unknown and deserves further studies.

54 TMEM120A (transmembrane protein 120A, also called TACAN) was initially reported as a  
55 nuclear envelope transmembrane protein critical for adipocyte differentiation (Malik et al.,  
56 2010). It was recently shown to form a mechano-sensitive ion channel sensing the pain  
57 (Beaulieu-Laroche et al., 2020), but this was challenged by subsequent structural and functional  
58 studies (Del Rosario et al., 2021; Ke et al., 2021; Niu et al., 2021; Parpaite et al., 2021; Rong et  
59 al., 2021; Xue et al., 2021). Global knockout of TACAN led to embryo death indicating its  
60 importance for embryonic development (Beaulieu-Laroche *et al.*, 2020). Wide distribution of  
61 TACAN in non-neuronal tissues such as kidney, heart and intestine indicate its biological  
62 functions besides pain sensation (Beaulieu-Laroche et al., 2020). Previous proteomic screen  
63 suggested a potential interaction of PKD2 with TACAN (Sharif-Naeini et al., 2009) but their  
64 interaction has yet to be characterized and functional implications to be explored.

65 In the present study, we examined how TACAN modulates the PKD2 channel function using the  
66 two-electrode voltage clamp (TEVC) electrophysiology in *Xenopus* oocytes and single-channel  
67 patch clamp electrophysiology in Chinese hamster ovary (CHO) cells. We explored the  
68 subcellular localization of endogenous PKD2 and TACAN in different renal cell lines. We also  
69 characterized the interaction between TACAN and PKD2 by means of co-immunoprecipitation  
70 (co-IP) and immunofluorescence, and explored the relationship between physical association and  
71 functional regulation. Further, we examined how TACAN regulates PKD2 deficiency-associated  
72 disorders in zebrafish models by clustered regularly interspaced short palindromic  
73 repeats/CRISPR-associated protein 9 (CRISPR/Cas9).

## 74 Results

### 75 Effects of TACAN on the PKD2 channel function

76 TACAN was indicated as a potential interactor of PKD2 through a proteomic screen using  
77 smooth muscle cells (Sharif-Naeini et al., 2009). To determine whether and how TACAN  
78 modulates the PKD2 channel function, we utilized *Xenopus* oocyte expression together with the  
79 two-electrode voltage clamp (TEVC). The whole-cell channel activity of wild-type (WT) PKD2  
80 in oocytes is hardly detectable in part due to its low expression on the plasma membrane and  
81 unknown agonist. We instead recorded the current mediated by PKD2 gain-of-function (GOF)  
82 mutant F604P (Arif Pavel et al., 2016) in oocytes, similarly as we did previously (Zheng et al.,  
83 2018a; Zheng et al., 2018b). We found that oocytes expressing human TACAN alone does not  
84 exhibit any significant increase in the current compared with water-injected oocytes (Fig. 1A and  
85 B). Co-expression of human PKD2 mutant F604P with TACAN is associated with significantly  
86 decreased current amplitudes compared with those with F604P expressed alone (Fig. 1A and B).  
87 Because expression of TACAN did not significantly affect the surface expression of F604P, as  
88 revealed by whole-cell immunofluorescence (Fig. 1C) and biotinylation assays (Fig. 1D), our  
89 data indicated that TACAN inhibits the F604P function. Interestingly, expression of F604P  
90 reduced both the total and surface expression of TACAN (Fig. 1E), but the underlying  
91 mechanism remains unknown.

92 Next, we examined whether TACAN affected the F604P ion selectivity using extracellular  
93 solutions containing 100 mM Na<sup>+</sup>, Li<sup>+</sup>, K<sup>+</sup> or non-permeable N-methyl-d-glucamine (NMDG,  
94 negative control). We found that the reversal potentials obtained under different solutions for  
95 F604P + TACAN were not significantly different from those for F604P (Fig. 1F), indicating that  
96 TACAN does not significantly affect the cation selectivity (with permeability ratios  $P_{Na} : P_{Li} : P_{K}$   
97 = 1 : 1.65 : 2.15 for F604P, consistent with previous reports (Shen et al., 2016), and  $P_{Na} : P_{Li} : P_{K}$   
98 = 1 : 1.66 : 2.15 for F604P + TACAN). Extracellular Ca<sup>2+</sup> is known to reduce the PKD2  
99 conductance to monovalent cations (Arif Pavel et al., 2016; Shen et al., 2016). Here we found  
100 that Ca<sup>2+</sup> exhibits a similar inhibitory effect on F604P + TACAN and F604P alone (Fig. 1G and  
101 H). Taken together, our data showed that TACAN inhibits the mutant F604P channel activity but  
102 does not affect the cation selectivity or inhibition of F604P by extracellular Ca<sup>2+</sup>.

103 To further characterize how TACAN inhibits the PKD2 channel function, we performed single-  
104 channel patch clamp electrophysiology in CHO cells. Expression of TACAN with mutant F604P  
105 or WT PKD2 substantially reduced the single-channel amplitude and open probability while  
106 TACAN expressed alone did not induce any specific current under our experimental condition  
107 (Fig. 2A and B), consistent with whole-cell data obtained using oocytes. We also noticed that at  
108 +80 mV in the absence of TACAN the single-channel amplitude and open probability values for  
109 PKD2 are significantly lower than those for mutant F604P, which together with a lower density  
110 of PKD2 on the surface membrane may account for its much lower whole-cell currents.

111 We next examined pressure sensitivity of PKD2 in CHO cells with or without co-expression of  
112 TACAN. PKD2 in complex with PKD1 or TRPV4 was reported to be involved in mechano  
113 sensing (Köttgen et al., 2008; Nauli et al., 2003) but whether PKD2, PKD1, TRPV4 or an  
114 unknown binding protein senses mechanical stimuli is not well understood. With PKD2  
115 expressed alone in CHO cells, pressure up to -30 mm Hg had no effect on the single-channel  
116 amplitude or open probability (Fig. 2C). In contrast, in the presence of TACAN co-expression,  
117 the open probability value significantly increased with negative pressure while the single-

118 channel current amplitude was insensitive to the pressure (Fig. 2D). These data showed that  
119 channel complex PKD2/TACAN possesses mechano sensitivity mediated by TACAN, which the  
120 single-channel open probability, but not the unitary current, stimulated by the pressure. Of note,  
121 no channel activity was observed in cells expressing TACAN alone with pressure up to -30 mm  
122 Hg (Fig. S1). Increasing the pressure beyond -30 mm Hg in our setup generated non-specific  
123 leak currents, presumably due to broken cell membrane.

124 Besides inhibiting the F604P steady-state currents TACAN induced significant inactivation of  
125 the F604P-mediated currents at depolarization (Fig. 3A). The steady-state current to the peak  
126 current ratio for F604P alone was close to 1 ( $1.01 \pm 0.01$  at +100 mV,  $N = 7$ ,  $p = 0.73$ ), ie, there  
127 was no appreciable inactivation, while this ratio decreased to  $0.67 \pm 0.04$  ( $N = 7$ ,  $p < 0.001$ ) with  
128 TACAN co-expression (Fig. 3B). The current inactivation at depolarizations (+50 to +100 mV)  
129 in the presence of TACAN was voltage dependent, with time constant ( $\tau$ ) values in the range of  
130  $139.23 \pm 15.43$  and  $33.8 \pm 4.80$  ms ( $N = 7$ ) obtained from exponential fits (Fig. 3C).

131 Interestingly, significant inactivation at polarized voltages was also present in PKD2 GOF gate  
132 mutant L677G expressed alone (Fig. 3D). Unlike the F604P mutation, which locks PKD2 in an  
133 activated configuration, the GOF of the L677G mutation is due to direct increases in the pore  
134 hydrophilicity and size, which would infer that the L677G mutant protein may still be in a basal  
135 configuration similar to WT PKD2 (Zheng et al., 2018b). Interestingly, although TACAN  
136 significantly reduced the steady-state currents of L677G (Fig. 3D-F, it did not affect the  
137 inactivating part of the L677G currents, which were associated with a similar range of  
138 inactivation time constant compared with F604P + TACAN (Fig. 3G vs Fig. 3C). These data  
139 together seemed to suggest that inactivation occurs when PKD2 protein is in an inhibited (F604P  
140 + TACAN) or a basal state (L677G, with or without TACAN) but not in an activated state  
141 (F604P alone).

## 142 **Physical interaction between PKD2 and TACAN**

143 TACAN was shown to be highly expressed in the kidney (Beaulieu-Laroche et al., 2020). We  
144 wanted to check the subcellular localization of PKD2 and TACAN by means of double  
145 immunofluorescence assays in ciliated epithelia Madin-Darby Canine Kidney (MDCK), inner  
146 medullary collecting duct (IMCD), and Lilly Laboratories Cell-Porcine Kidney 1 (LLC-PK1)  
147 cell lines. We found that the endogenous PKD2 and TACAN both display enhanced staining in  
148 the primary cilia in all the three cell lines (Fig. 4A), indicating co-distribution of the two  
149 proteins. We also performed co-IP experiments using these cell lines to assess their interaction  
150 and found that PKD2 is present in the immunoprecipitates obtained with an anti-TMEM120A  
151 antibody, but not in those with IgG (control) (Fig. 4B), demonstrating that PKD2 and TACAN  
152 are in the same protein complex in these native cells.

153 We next wanted to characterize the physical interaction between PKD2 and TACAN interaction  
154 in oocytes to better relate to our functional data. Indeed, TACAN co-immunoprecipitated  
155 TACAN and mutant F604P in oocytes and reversely, mutant F604P was able to precipitate  
156 TACAN (Fig. 5A-C), indicating that PKD2 and TACAN are in the same complex in oocytes. We  
157 then used chemical cross-linking to examine the subunit stoichiometry of the PKD2/TACAN  
158 complex. However, the complex cannot be detected under our conditions although we  
159 successfully detected TACAN dimers and different PKD2 oligomers (Fig. S2A). The coiled-coil  
160 domain (amino-acid (aa) G9-L100) in the TACAN N-terminus was proposed to be important for  
161 oligomerization (Batrakou et al., 2015). Indeed, we found aggregation of the N-terminus in our  
162 chemical cross-linking experiments. Further, TACAN lacking the entire N-terminus still formed



163 the dimer (Fig. S2B), indicating that the TACAN dimeric assembly is independent of its coiled-  
164 coil domain. Furthermore, we generated different fragments of TACAN, which possesses six  
165 TMs (S1-S6), to narrow down the domain(s) mediating physical and functional interaction with  
166 PKD2. By co-IP assays we found that TACAN fragments containing S1 (K135-T160) or S6  
167 (L296-D343), but not the N-terminus (K135X), interacts with PKD2 F604P (Fig. 5D). While S1-  
168 containing TACAN fragments exhibited no functional effect on F604P, interestingly, S6-  
169 containing fragments lacking the N-terminus exhibited significant inhibitory effects (Fig. 5E).  
170 Further, this inhibition was even stronger than the one by full-length TACAN (Fig. 5E),  
171 presumably because these fragments can't form dimers (Fig. S2B), which enhanced their  
172 interaction with F604P.

173 Reversely, we wanted to identify which part(s) in PKD2 is involved in the interaction with  
174 TACAN. We performed co-IP experiments in CHO cells expressing TACAN together with the  
175 PKD2 N-terminus (PKD2-N, M1-K215), C-terminus (PKD2-C, D682-V968), or PKD2 lacking  
176 both the N- and C-termini (PKD2-TM, S209-K688). PKD2-TM but not PKD2-N or PKD2-C  
177 conferred interaction with TACAN (Fig. 6A), which challenges the previous proteomic screen  
178 study indicating that TACAN binds to the PKD2 C-terminus (Sharif-Naeini et al., 2009).

179 The PKD2 pore domain is formed by S5, S5-S6 loop and S6 (A594-Q693) (Shen et al., 2016).  
180 We next examined whether TACAN participates in the pore formation in the PKD2/TACAN  
181 channel complex. For this purpose, we tested whether TACAN interacts with truncation mutant  
182 A594X (no pore domain) or fragment N580-L700 containing the pore domain. Surprisingly,  
183 TACAN can interact with either of them (Fig. 6B), indicating that PKD2 also contains at least  
184 two domains interacting with TACAN. Because the TACAN S1 and S6 interacted with PKD2,  
185 we continued to narrow down the corresponding binding domains in PKD2. We found by co-IP  
186 that PKD2 A594X interacts with TACAN S6, while PKD2 N580-L700 interacts with TACAN  
187 S1 (Fig. 6C). Since the interaction between S6 was functionally critical, it highly suggested that  
188 instead of acting as the pore formation subunit, TACAN mainly binds at the peripheral domain  
189 (S1-S4) to regulate PKD2 channel function.

190 We wondered whether the PKD2/TACAN binding is required for inhibition of the PKD2  
191 function by TACAN. For this, we co-expressed the TACAN N-terminus (K135X) in the  
192 presence of F604P and TACAN, and indeed found that K135X represses the PKD2/TACAN  
193 association (Fig. 7A), indicating that K135X acts as an effective blocking peptide, presumably  
194 because it can compete with PKD2 for binding (dimerizing) with TACAN (see Fig. S2). Further,  
195 K135K which had no functional effect on PKD2 (Fig. 5E) significantly represses the inhibition  
196 of the PKD2 function by TACAN (Fig. 7B). Our data together thus demonstrated that inhibition  
197 of the PKD2 function by TACAN is mediated by their physical association.

## 198 **Regulation of the PKD2 function in zebrafish by TACAN**

199 We next utilized zebrafish models to investigate the regulatory role *in vivo* of TACAN in PKD2.  
200 Sufficient reduction in the PKD2 expression or function in larval zebrafish results in the presence  
201 of tail curvature and pronephric cysts resembling renal cysts in mammals (Zheng et al., 2016).  
202 Here, we employed the clustered regularly interspaced short palindromic repeats/CRISPR-  
203 associated protein 9 (CRISPR/Cas9) technique and successfully knocked down the endogenous  
204 PKD2 in larval fish at 3 days post-fertilization (dpf) through injection of 200 pg PKD2 sgRNA  
205 and 300 pg Cas9 per embryo, which resulted in tail curling (Fig. 8A and B). We reasoned that if  
206 we reduce the injected PKD2 sgRNA and Cas9 amounts there may be no or low occurrence of

207 tail curling but co-expression of TACAN may significantly aggravate the severity of the disease  
208 if the PKD2 function is inhibited.

209 Indeed, while injection of 100 pg PKD2 sgRNA and 200 pg Cas9 per embryo was associated  
210 with low percentage of fish with tail curling, co-expression of human TACAN through co-  
211 injection on *in vitro* transcribed mRNA (100 pg/embryo) substantially increased the occurrence  
212 of tail curling (Fig. 8C and D), consistent with the assumption that the PKD2 function is  
213 inhibited by over-expressed TACAN, which was observed in oocytes and CHO cells. Our  
214 Western blot experiments showed that the PKD2 expression is not significantly reduced by  
215 TACAN over-expression (Fig. 8E), which is in agreement with our data from cellular models.  
216 We also observed that TACAN over-expression alone did not significantly increase the  
217 occurrence of tail curling (Fig. 8D), indicating that the functional inhibition of the endogenous  
218 PKD2 by TACAN is in general insufficient to induce the disease. We also examined pronephric  
219 cysts in larval fish and found that TACAN co-expression substantially increases the occurrence  
220 of pronephric cysts while TACAN over-expression or PKD2 knockdown alone exhibits no or  
221 low occurrence of pronephric cyst (Fig. 8F and G). Taken together, our data demonstrated that  
222 TACAN aggravates PKD2-dependent disease severity in larval zebrafish, presumably through  
223 repressing the PKD2 channel function.

## 224 Discussion

225 TACAN is a transmembrane protein that is evolutionally conserved and was recently reported to  
226 be involved in sensing mechanical stimuli (Beaulieu-Laroche et al., 2020). Its intracellular N-  
227 terminal coiled-coil domain (aa G9-L100) was reported to be important for oligomerization  
228 (Batrakou et al., 2015), consistent with our cross-linking results showing that deletion of the N-  
229 terminus significantly reduced its dimerization. However, the remaining dimers indicate the  
230 presence of another domain important for dimerization. While this other domain involved in  
231 homo-dimerization remains unknown, our current study showed that the TACAN TM domains  
232 S1 and S6 mediate binding with PKD2. Interestingly, while the PKD2 C-terminal coiled-coil  
233 domain was reported to be involved in interaction with PKD1 (Qian et al., 1997; Tsiokas et al.,  
234 1997; Yu et al., 2009), heterotetrameric PKD1/PKD2 structure was revealed by cryo-EM in the  
235 absence of the PKD2 coiled-coil domain (Su et al., 2018), demonstrating that the domain is not  
236 essential for the PKD1/PKD2 complexing. In fact, we here showed that the PKD2 TMs but not  
237 its N- or C-terminus interacts with the TACAN S1 and S6.

238 Besides homotetramerization, PKD2 can heteromerize with PKD1 and TRP channels including  
239 TRPC1, -C3, -C4, -C7 and -V4 (Cheng et al., 2010; Grieben et al., 2017; Shen et al., 2016).  
240 PKD2 homo- and heterotetrameric channels have distinct biophysical properties as well as  
241 distinct subcellular localizations (Cheng et al., 2010). The PKD1/PKD2 heterotetrameric channel  
242 defective in ADPKD has a 1:3 stoichiometry (Su et al., 2018). While it is well known that PKD1  
243 promotes the plasma membrane trafficking of PKD2, how it contributes to the channel pore  
244 formation is not well understood (Ha et al., 2020; Wang et al., 2019). PKD1/PKD2 located in  
245 renal epithelial primary cilia was previously shown to mediate mechano-dependent  $Ca^{2+}$   
246 entry (Nauli et al., 2003) but subsequent studies found that, controversially, the  $Ca^{2+}$  entry is  
247 PKD1-independent (Liu et al., 2018). PKD2/TRPC4 in the MDCK primary cilia was found to be  
248 involved in flow sensing but the role of primary cilia and mammalian TRP channels in mechano  
249 sensing remains debatable (Delling et al., 2016; Köttgen et al., 2008; Nikolaev et al., 2019). Our  
250 current study found that in the PKD2/TACAN channel complex TACAN but not PKD2 confers  
251 mechano sensitivity (Fig. 2D). It will be interesting to investigate whether TACAN plays a role  
252 in the pathogenesis of ADPKD.

253 Mammalian TACAN (TMEM120A) and its homologue TMEM120B (70.5% sequence identity)  
254 are generated as a result of gene duplication. However, when they were expressed in CHO cells,  
255 only TACAN induced mechano-sensitive currents (Beaulieu-Laroche et al., 2020). TACAN, but  
256 not TMEM120B, was reported to inhibit the Piezo2 channel function (Del Rosario et al., 2021).  
257 It will be of interest to determine whether TMEM120B regulates the PKD2 function.

258 Zebrafish has a relatively simple renal system called pronephros that develop within 24 hours  
259 post-fertilization (hpf) and represents an established PKD model with easy visualization of  
260 organs and tissues with transparent embryos and larvae, and the ability for rapid phenotype  
261 analysis. PKD2 knockdown (KD) by injection of morpholino antisense oligonucleotides (MO) in  
262 zebrafish embryos results in tail curling and pronephric cysts at 3-5 days post-fertilization (dpf)  
263 (Zheng et al., 2016). However, because MO knockdown may have off-target effects, in the  
264 present study we knocked down PKD2 by CRISPR/Cas9, which is known to be more specific  
265 than MO knockdown. Our study using larval zebrafish demonstrated that TACAN aggravates the  
266 severity of PKD2 insufficiency-dependent diseases, presumably through repressing the PKD2



267 function but not the expression, consistent with its regulatory effect on PKD2 using cellular  
268 models.

269 Interestingly, it was reported that TMEM33, an activator of PKD2, which forms a complex on  
270 the endoplasmic reticulum (ER) membrane, but not in primary cilia, fails to regulate PKD2-  
271 dependent pronephric renal cystogenesis in zebrafish (Arhatte et al., 2019), indicating that PKD2  
272 located on the ER membrane is not involved in cystogenesis. Thus, the colocalization or  
273 interaction of PKD2 and TACAN in the renal primary cilia may be important for TACAN to  
274 confer its regulatory role in PKD2 and the associated disease phenotypes in zebrafish.

275 The report that TACAN acts as an ion channel has been challenged by recent structural and  
276 functional studies (Beaulieu-Laroche et al., 2020; Del Rosario et al., 2021; Ke et al., 2021; Niu et  
277 al., 2021; Parpaite et al., 2021; Rong et al., 2021; Xue et al., 2021). However, the concept that  
278 TACAN is an ion channel is supported by a recent report showing that a point mutation at a  
279 candidate pore gate residue significantly increases the channel activity (Chen et al., 2021) and  
280 that, by molecular dynamic simulations, each TACAN monomer contains an ion conducting  
281 pathway but multiple subunits might be required for TACAN to form a functional ion channel.  
282 Also, TACAN was shown to be involved in regulation of ion transport based on its involvement  
283 in regulation of the expression of different proteins including  $Ca^{2+}$  ATPase, ATP2a1 and  
284 TMEM150C, a general regulator of mechano-sensitive channels such as Piezo1, Piezo2 and the  
285 potassium channel TREK-1 (Anderson et al., 2018). Structural studies found that TACAN  
286 structure resembles that of the long-chain fatty acid elongase 7 (Ke et al., 2021; Niu et al., 2021;  
287 Rong et al., 2021; Xue et al., 2021), suggesting the possibility that TACAN may act as an  
288 enzyme. In addition to our current finding, TACAN was previously reported to be an inhibitor of  
289 Piezo2, but not Piezo1 or TREK-1, but with an unclear mechanism of inhibition (Del Rosario et  
290 al., 2021).

291 In summary, our present study found that TACAN inhibits the PKD2 function through the  
292 physical PKD2/TACAN association. It is unlikely that TACAN participates in the pore  
293 formation in the PKD2/TACAN channel complex since TACAN-S6 that doesn't seem to be  
294 sufficient for contributing to pore formation still exhibited an inhibitory effect. As a novel  
295 regulator of PKD2, TACAN inhibits PKD2 *in vitro* and *in vivo*. Blocking peptides such as  
296 K135X may eventually lead to specific peptide molecules with therapeutic potential for ADPKD.

## 297 **Methods**

### 298 **Plasmids, reagents and antibodies**

299 HA-tagged human PKD2 (HA-PKD2) in vector pGEMHE for *Xenopus* oocyte expression and  
300 PKD2 mutant F604P in vector pcDNA3.1 for mammalian cell expression were obtained from  
301 Dr. Yong Yu (St. John's University, NY). Human HA-TACAN in a modified pCMV vector for  
302 mammalian cell expression, a kind gift from Dr. Reza Sharif-Naeini (McGill University, QC,  
303 Canada), was subcloned into vector pGEMHE for oocyte expression, with a 5' Flag tag. Human  
304 PKD2, PKD2-N, PKD2-TM and PKD2-C in vector pEGFP for oocyte expression were  
305 constructed previously (Wang et al., 2012). All mutations were carried out using Q5 High-  
306 Fidelity 2X Master Mix from New England Biolabs (NEB, Ottawa, ON, Canada) and verified by  
307 sequencing. Antibodies against  $\beta$ -actin and Arl13b were from Santa Cruz Biotechnology (Santa  
308 Cruz, CA) and those against Flag, HA, TMEM120A and PKD2 were from Proteintech Group  
309 (Rosemont, IL). Secondary antibodies were purchased from GE Healthcare (Waukesha, WI).  
310 DTT was purchased from Thermo Fisher Scientific (Ottawa, ON, Canada) and disuccinimidyl  
311 tartrate (DST) from CovaChem (Loves Park, IL).

### 312 ***Xenopus* oocyte expression**

313 Capped RNAs encoding human PKD2, human TACAN or their mutants were synthesized by *in*  
314 *vitro* transcription using the T7 mMESSAGE mMACHINE kit (Invitrogen, Waltham, MA) and  
315 injected into oocytes (25 ng each), as described (Cai et al., 2020). Control oocytes were injected  
316 with the same amount of water. Oocytes were incubated at 18°C for 2-3 days before  
317 measurements. The present study was approved by the Ethical Committee for Animal  
318 Experiments of the University of Alberta and performed in accordance with the Guidelines for  
319 Research with Experimental Animals of the University of Alberta and the Guide for the Care and  
320 Use of Laboratory Animals (NIH Guide) revised in 1996.

321

### 322 **Culture and transfection of mammalian cells**

323 CHO cells were cultured in Dulbecco's Modified Eagle Medium/Nutrient Mixture F-12  
324 (DMEM/F12) supplemented with L-glutamine, penicillin-streptomycin and 10% fetal bovine  
325 serum (FBS). MDCK, IMCD and LLC-PK1 cells were cultured in DMEM supplemented with L-  
326 glutamine, penicillin-streptomycin and 10% FBS. All cultured cells were kept at 37°C with 5%  
327 CO<sub>2</sub>. Transfection of cDNAs was performed using Lipofectamine 3000 (Invitrogen) according to  
328 the manufacturer's protocol.

### 329 **Two-electrode voltage clamp**

330 The two-electrode voltage clamp electrophysiology experiments in *Xenopus* oocytes were  
331 performed as we described previously (Zheng et al., 2018a). Briefly, an electrode made of a  
332 capillary glass pipette (Warner Instruments, Hamden, CT) was filled with 3 M KCl and impaled  
333 an oocyte to form a tip resistance of 0.3-2 M $\Omega$ . The Geneclamp 500B amplifier and Digidata  
334 1322A AD/DA converter (Molecular Devices, Union City, CA) were used to record the whole-  
335 cell currents and membrane potentials. The pClamp 9 software (Axon Instruments, Union City,  
336 CA) was used to acquire and analyze the data. Both signals were digitized at 200  $\mu$ s/sample and  
337 filtered at 2 kHz through a Bessel filter. Data were plotted using SigmaPlot 13 (Systat Software,  
338 San Jose, CA) or GraphPad Prism 8 (GraphPad Software, San Diego, CA).

### 339 **Patch clamp**

340 Patch-clamp recordings were carried out as we described previously (Fatehi et al., 2017), under  
341 voltage clamp at room temperature (~22°C). The recording pipette and chamber were coupled by  
342 Ag/AgCl electrodes to an Axopatch 200B patch-clamp amplifier and Digidata 1200A BNC data-  
343 acquisition system, controlled by pCLAMP 10 software (Axon Instruments). Both bath and  
344 pipette solutions were composed of (in mM) 140 NaCl, 5 KCl, 2 CaCl<sub>2</sub>, 2 MgCl<sub>2</sub>, 10 HEPES, 10  
345 glucose and pH 7.4. The seal resistance was no less than 5 GΩ for all cell-attached recordings.  
346 The recordings were low-pass filtered at 1 kHz following acquisition. Linear stepwise negative  
347 pressures (by suction) of various magnitudes were applied to the interior of the glass pipette  
348 using a high-speed pressure clamp system (HSPC-1, ALA Scientific, Farmingdale, NY).

### 349 **Western blot and surface protein biotinylation**

350 *Xenopus* oocytes after 3-times washing with ice-cold PBS solution were incubated with 0.5  
351 mg/ml sulfo-NHS-SS-Biotin (Pierce, Rockford, IL) for 30 min at room temperature. Non-reacted  
352 biotin was quenched by 1 M NH<sub>4</sub>Cl. Oocytes were then washed with ice-cold PBS solution and  
353 harvested in ice-cold CelLytic M lysis buffer (Sigma-Aldrich, St. Louis, MO) supplemented with  
354 proteinase inhibitor cocktail (Thermo Fisher Scientific). Upon addition of 100 μl streptavidin  
355 (Pierce) lysates were incubated at 4 °C overnight with gentle shaking. The surface protein bound  
356 to streptavidin was resuspended in SDS loading buffer and subjected to SDS-PAGE.

### 357 **Chemical cross-linking**

358 Chemical cross-linking assays were performed as previously described (Yu et al., 2009). Oocytes  
359 expressing desired proteins were harvested in ice-cold CelLytic M lysis buffer (Sigma-Aldrich)  
360 supplemented with proteinase inhibitor cocktail (Thermo Fisher Scientific). Fresh crosslinker  
361 stock solutions were prepared by dissolving DST (CovaChem) into dimethylsulfoxide (Sigma-  
362 Aldrich). Cross-linking reactions were carried out by diluting the stock solution into the cell  
363 lysate samples, followed by incubation on ice for 4 h. SDS loading buffer was used to stop the  
364 reactions. The samples were incubated at 37 °C for 30 min and subjected to SDS-PAGE.

### 365 **Immunofluorescence**

366 Whole-mount immunofluorescence assays using *Xenopus* oocytes were performed as described  
367 (Zheng et al., 2018a). Briefly, oocytes were washed in PBS, fixed in 4% paraformaldehyde for  
368 15 min, washed three times in PBS plus 50 mM NH<sub>4</sub>Cl, and then permeabilized with 0.1%  
369 Triton X-100 for 4 min. Oocytes were then blocked in PBS plus 3% skim milk for 30 min and  
370 then incubated overnight with indicated primary antibodies, followed by incubation with  
371 secondary Alexa-488-conjugated donkey anti-rabbit or Cy3-conjugated goat anti-mouse antibody  
372 (Jackson ImmunoResearch Laboratories, West Grove, PA) for 30 min. Oocytes were then  
373 mounted in Vectashield (Vector Labs, Burlington, ON, Canada) and examined on an AIVI  
374 spinning disc confocal microscopy (Cell Imaging Facility, Faculty of Medicine and Dentistry,  
375 University of Alberta).

### 376 **Co-IP**

377 Co-IP experiments were performed as we previously described (Zheng et al., 2018a). Briefly, a  
378 group of 20-30 oocytes washed with PBS were solubilized in ice-cold CelLytic-M lysis buffer  
379 (Sigma-Aldrich) supplemented with proteinase inhibitor cocktail. Supernatants were collected  
380 after centrifugation at 13,200 rpm for 15 min and precleaned for 1 h with 50% protein G-  
381 Sepharose (GE Healthcare), followed by incubation with an indicated antibody at 4 °C for 4 h.  
382 Upon addition of 100 μl of 50% protein G-Sepharose, the mixture was incubated at 4 °C

383 overnight with gentle shaking. The immune complexes conjugated to protein G-Sepharose were  
384 washed three times with cold PBS solution containing 1% Nonidet P-40 and eluted by SDS  
385 loading buffer. Precipitated proteins were subjected to Western blot analysis.

### 386 **Zebrafish experiments**

387 Zebrafish experiments were modified from one described previously (Zheng et al., 2018b).  
388 Briefly, embryos of WT zebrafish AB line were grown at 28.5 °C in water supplemented with 60  
389 µg/ml Instant Ocean Sea salts. Single guide RNAs (sgRNAs: AGAACACCGCTCTAGTGCCG)  
390 targeting the first coding exon of zebrafish PKD2 was designed and synthesized. The Cas9  
391 protein was purchased from NEB. Mixture of sgRNA (100 pg) and Cas9 (200 pg) was injected  
392 into each fertilized embryo at 1-2 hpf for PKD2 KD. The effect of injected CRISPR/Cas9 was  
393 confirmed by sequencing. Human TACAN mRNA was injected into fertilized embryos at 1-2  
394 hpf at 100 pg each. This study has been approved by the Hubei University of Technology animal  
395 welfare regulations and maintained according to standard protocols (<http://ZFIN.org>).

396 Histological analysis was performed as previously reported (Wang et al., 2020). Briefly,  
397 embryos at 3 dpf were anesthetized in tricaine solution and fixed in 4% PFA at 4 °C. After 3-  
398 times wash (20 min each) in cold PBS, embryos were decalcified in EDTA solution (684 mM  
399 EDTA, pH 8.0) and then washed (2 × 20 min) with DEPC solution and dehydrated through  
400 graded alcohol. Before paraffin processing, embryos were embedded in 1% agarose (Sigma-  
401 Aldrich) in TAE buffer (Thermo Fisher Scientific). Subsequently, samples were sectioned  
402 transversely at 5 µm thickness using a HM325 manual rotary microtome (Thermo Fisher  
403 Scientific). H&E staining was processed with Varistain TM Gemini ES Automated Slide Stainer  
404 (Thermo Fisher Scientific).

### 405 **Statistical analysis**

406 All statistical data in this study were represented as mean ± SEM (standard error of the mean)  
407 from N measurements. Student's t-test was used for two groups comparisons and one-way  
408 ANOVA for multiple groups comparisons. \*, \*\* and \*\*\* indicate  $p < 0.05$ , 0.01 and 0.001,  
409 respectively; ns indicates statistically not significant.

410 **Author contributions**

411 Conceptualization, X.L., and X.-Z.C.; Investigation, X.L., R.Z., M.F., Y.W., W.L., R.T., X.D.,  
412 Z.W.; Supervision, P.R.L., J.T., and X.-Z.C. Writing, X.L., and X.-Z.C.

413 **Acknowledgments**

414 We would like to thank Dr. Reza Sharif-Naeini for sharing TACAN related plasmids. This work  
415 was supported by the Natural Sciences and Engineering Research Council of Canada (NSERC),  
416 the Kidney Foundation of Canada (to X.Z.C.) and National Natural Science Foundation of China  
417 (grant # 31871176 and 32070726, to J.T.). X.L. was a recipient of the Alberta Graduate  
418 Excellence Scholarship.

419 **Declaration of Interests**

420 The authors declare no competing interests.



## 421 **References**

- 422 Anderson, E.O., Schneider, E.R., Matson, J.D., Gracheva, E.O., and Bagriantsev, S.N. (2018).  
423 TMEM150C/Tentonin3 Is a Regulator of Mechano-gated Ion Channels. *Cell reports* 23, 701-  
424 708. 10.1016/j.celrep.2018.03.094.
- 425 Arhatte, M., Gunaratne, G.S., El Boustany, C., Kuo, I.Y., Moro, C., Duprat, F., Plaisant, M.,  
426 Duval, H., Li, D., Picard, N., et al. (2019). TMEM33 regulates intracellular calcium homeostasis  
427 in renal tubular epithelial cells. *Nature communications* 10, 2024. 10.1038/s41467-019-10045-y.
- 428 Arif Pavel, M., Lv, C., Ng, C., Yang, L., Kashyap, P., Lam, C., Valentino, V., Fung, H.Y.,  
429 Campbell, T., Møller, S.G., et al. (2016). Function and regulation of TRPP2 ion channel revealed  
430 by a gain-of-function mutant. *Proceedings of the National Academy of Sciences of the United*  
431 *States of America* 113, E2363-2372. 10.1073/pnas.1517066113.
- 432 Batrakou, D.G., de Las Heras, J.I., Czapiewski, R., Mouras, R., and Schirmer, E.C. (2015).  
433 TMEM120A and B: Nuclear Envelope Transmembrane Proteins Important for Adipocyte  
434 Differentiation. *PloS one* 10, e0127712. 10.1371/journal.pone.0127712.
- 435 Beaulieu-Laroche, L., Christin, M., Donoghue, A., Agosti, F., Yousefpour, N., Petitjean, H.,  
436 Davidova, A., Stanton, C., Khan, U., Dietz, C., et al. (2020). TACAN Is an Ion Channel Involved  
437 in Sensing Mechanical Pain. *Cell* 180, 956-967.e917. 10.1016/j.cell.2020.01.033.
- 438 Bergmann, C., Guay-Woodford, L.M., Harris, P.C., Horie, S., Peters, D.J.M., and Torres, V.E.  
439 (2018). Polycystic kidney disease. *Nature reviews. Disease primers* 4, 50. 10.1038/s41572-018-  
440 0047-y.
- 441 Cai, R., Liu, X., Zhang, R., Hofmann, L., Zheng, W., Amin, M.R., Wang, L., Hu, Q., Peng, J.B.,  
442 Michalak, M., et al. (2020). Autoinhibition of TRPV6 Channel and Regulation by PIP2. *iScience*  
443 23, 101444. 10.1016/j.isci.2020.101444.
- 444 Chen, X., Wang, Y., Li, Y., Lu, X., Chen, J., Li, M., Wen, T., Liu, N., Chang, S., Zhang, X., et  
445 al. (2021). Cryo-EM structure of the human TACAN channel in a closed state. *bioRxiv*,  
446 2021.2008.2023.457436. 10.1101/2021.08.23.457436.
- 447 Cheng, W., Sun, C., and Zheng, J. (2010). Heteromerization of TRP channel subunits: extending  
448 functional diversity. *Protein & cell* 1, 802-810. 10.1007/s13238-010-0108-9.
- 449 Del Rosario, J.S., Gabrielle, M., Yudin, Y., and Rohacs, T. (2021). TMEM120A/TACAN  
450 inhibits mechanically activated Piezo2 channels. *bioRxiv*, 2021.2006.2030.450616.  
451 10.1101/2021.06.30.450616.
- 452 Delling, M., Indzhykulian, A.A., Liu, X., Li, Y., Xie, T., Corey, D.P., and Clapham, D.E. (2016).  
453 Primary cilia are not calcium-responsive mechanosensors. *Nature* 531, 656-660.  
454 10.1038/nature17426.
- 455 Douguet, D., Patel, A., and Honoré, E. (2019). Structure and function of polycystins: insights  
456 into polycystic kidney disease. *Nature reviews. Nephrology* 15, 412-422. 10.1038/s41581-019-  
457 0143-6.
- 458 Fatehi, M., Carter, C.C., Youssef, N., and Light, P.E. (2017). The mechano-sensitivity of cardiac  
459 ATP-sensitive potassium channels is mediated by intrinsic MgATPase activity. *Journal of*  
460 *molecular and cellular cardiology* 108, 34-41. 10.1016/j.yjmcc.2017.05.004.
- 461 Grieben, M., Pike, A.C., Shintre, C.A., Venturi, E., El-Ajouz, S., Tessitore, A., Shrestha, L.,  
462 Mukhopadhyay, S., Mahajan, P., Chalk, R., et al. (2017). Structure of the polycystic kidney  
463 disease TRP channel Polycystin-2 (PC2). *Nature structural & molecular biology* 24, 114-122.  
464 10.1038/nsmb.3343.

465 Ha, K., Nobuhara, M., Wang, Q., Walker, R.V., Qian, F., Schartner, C., Cao, E., and Delling, M.  
466 (2020). The heteromeric PC-1/PC-2 polycystin complex is activated by the PC-1 N-terminus.  
467 *eLife* 9. 10.7554/eLife.60684.

468 Harris, P.C., and Torres, V.E. (2009). Polycystic kidney disease. *Annual review of medicine* 60,  
469 321-337. 10.1146/annurev.med.60.101707.125712.

470 Ke, M., Yu, Y., Zhao, C., Lai, S., Su, Q., Yuan, W., Yang, L., Deng, D., Wu, K., Zeng, W., et al.  
471 (2021). Cryo-EM structures of human TMEM120A and TMEM120B. *Cell discovery* 7, 77.  
472 10.1038/s41421-021-00319-5.

473 Kobori, T., Smith, G.D., Sandford, R., and Edwardson, J.M. (2009). The transient receptor  
474 potential channels TRPP2 and TRPC1 form a heterotetramer with a 2:2 stoichiometry and an  
475 alternating subunit arrangement. *The Journal of biological chemistry* 284, 35507-35513.  
476 10.1074/jbc.M109.060228.

477 Köttgen, M., Buchholz, B., Garcia-Gonzalez, M.A., Kotsis, F., Fu, X., Doerken, M., Boehlke, C.,  
478 Steffl, D., Tauber, R., Wegierski, T., et al. (2008). TRPP2 and TRPV4 form a polymodal sensory  
479 channel complex. *The Journal of cell biology* 182, 437-447. 10.1083/jcb.200805124.

480 Liu, X., Vien, T., Duan, J., Sheu, S.H., DeCaen, P.G., and Clapham, D.E. (2018). Polycystin-2 is  
481 an essential ion channel subunit in the primary cilium of the renal collecting duct epithelium.  
482 *eLife* 7. 10.7554/eLife.33183.

483 Luciano, R.L., and Dahl, N.K. (2014). Extra-renal manifestations of autosomal dominant  
484 polycystic kidney disease (ADPKD): considerations for routine screening and management.  
485 *Nephrology, dialysis, transplantation : official publication of the European Dialysis and*  
486 *Transplant Association - European Renal Association* 29, 247-254. 10.1093/ndt/gft437.

487 Malik, P., Korfali, N., Srsen, V., Lazou, V., Batrakou, D.G., Zuleger, N., Kavanagh, D.M.,  
488 Wilkie, G.S., Goldberg, M.W., and Schirmer, E.C. (2010). Cell-specific and lamin-dependent  
489 targeting of novel transmembrane proteins in the nuclear envelope. *Cellular and molecular life*  
490 *sciences : CMLS* 67, 1353-1369. 10.1007/s00018-010-0257-2.

491 Nauli, S.M., Alenghat, F.J., Luo, Y., Williams, E., Vassilev, P., Li, X., Elia, A.E., Lu, W.,  
492 Brown, E.M., Quinn, S.J., et al. (2003). Polycystins 1 and 2 mediate mechanosensation in the  
493 primary cilium of kidney cells. *Nature genetics* 33, 129-137. 10.1038/ng1076.

494 Nikolaev, Y.A., Cox, C.D., Ridone, P., Rohde, P.R., Cordero-Morales, J.F., Vasquez, V., Laver,  
495 D.R., and Martinac, B. (2019). Mammalian TRP ion channels are insensitive to membrane  
496 stretch. *Journal of cell science* 132. 10.1242/jcs.238360.

497 Niu, Y., Tao, X., Vaisey, G., Olinares, P.D.B., Alwaseem, H., Chait, B.T., and MacKinnon, R.  
498 (2021). Analysis of the mechanosensor channel functionality of TACAN. *eLife* 10.  
499 10.7554/eLife.71188.

500 Parpaite, T., Brosse, L., Séjourné, N., Laur, A., Mechioukhi, Y., Delmas, P., and Coste, B.  
501 (2021). Patch-seq of mouse DRG neurons reveals candidate genes for specific mechanosensory  
502 functions. *Cell reports* 37, 109914. 10.1016/j.celrep.2021.109914.

503 Peyronnet, R., Martins, J.R., Duprat, F., Demolombe, S., Arhatte, M., Jodar, M., Tauc, M.,  
504 Duranton, C., Paulais, M., Teulon, J., et al. (2013). Piezo1-dependent stretch-activated channels  
505 are inhibited by Polycystin-2 in renal tubular epithelial cells. *EMBO reports* 14, 1143-1148.  
506 10.1038/embor.2013.170.

507 Qian, F., Germino, F.J., Cai, Y., Zhang, X., Somlo, S., and Germino, G.G. (1997). PKD1  
508 interacts with PKD2 through a probable coiled-coil domain. *Nature genetics* 16, 179-183.  
509 10.1038/ng0697-179.

510 Rong, Y., Jiang, J., Gao, Y., Guo, J., Song, D., Liu, W., Zhang, M., Zhao, Y., Xiao, B., and Liu,  
511 Z. (2021). TMEM120A contains a specific coenzyme A-binding site and might not mediate  
512 poking- or stretch-induced channel activities in cells. *eLife* *10*. 10.7554/eLife.71474.  
513 Sharif-Naeini, R., Folgering, J.H., Bichet, D., Duprat, F., Lauritzen, I., Arhatte, M., Jodar, M.,  
514 Dedman, A., Chatelain, F.C., Schulte, U., et al. (2009). Polycystin-1 and -2 dosage regulates  
515 pressure sensing. *Cell* *139*, 587-596. 10.1016/j.cell.2009.08.045.  
516 Shen, P.S., Yang, X., DeCaen, P.G., Liu, X., Bulkley, D., Clapham, D.E., and Cao, E. (2016).  
517 The Structure of the Polycystic Kidney Disease Channel PKD2 in Lipid Nanodiscs. *Cell* *167*,  
518 763-773.e711. 10.1016/j.cell.2016.09.048.  
519 Su, Q., Hu, F., Ge, X., Lei, J., Yu, S., Wang, T., Zhou, Q., Mei, C., and Shi, Y. (2018). Structure  
520 of the human PKD1-PKD2 complex. *Science (New York, N.Y.)* *361*. 10.1126/science.aat9819.  
521 Tsiokas, L., Kim, E., Arnould, T., Sukhatme, V.P., and Walz, G. (1997). Homo- and  
522 heterodimeric interactions between the gene products of PKD1 and PKD2. *Proceedings of the*  
523 *National Academy of Sciences of the United States of America* *94*, 6965-6970.  
524 10.1073/pnas.94.13.6965.  
525 Wang, Q., Dai, X.Q., Li, Q., Wang, Z., Cantero Mdel, R., Li, S., Shen, J., Tu, J.C., Cantiello, H.,  
526 and Chen, X.Z. (2012). Structural interaction and functional regulation of polycystin-2 by  
527 filamin. *PloS one* *7*, e40448. 10.1371/journal.pone.0040448.  
528 Wang, X., Giusti, A., Ny, A., and de Witte, P.A. (2020). Nephrotoxic Effects in Zebrafish after  
529 Prolonged Exposure to Aristolochic Acid. *Toxins* *12*. 10.3390/toxins12040217.  
530 Wang, Z., Ng, C., Liu, X., Wang, Y., Li, B., Kashyap, P., Chaudhry, H.A., Castro, A., Kalontar,  
531 E.M., Ilyayev, L., et al. (2019). The ion channel function of polycystin-1 in the polycystin-  
532 1/polycystin-2 complex. *EMBO reports* *20*, e48336. 10.15252/embr.201948336.  
533 Xue, J., Han, Y., Baniasadi, H., Zeng, W., Pei, J., Grishin, N.V., Wang, J., Tu, B.P., and Jiang,  
534 Y. (2021). TMEM120A is a coenzyme A-binding membrane protein with structural similarities  
535 to ELOVL fatty acid elongase. *eLife* *10*. 10.7554/eLife.71220.  
536 Yu, Y., Ulbrich, M.H., Li, M.H., Buraei, Z., Chen, X.Z., Ong, A.C., Tong, L., Isacoff, E.Y., and  
537 Yang, J. (2009). Structural and molecular basis of the assembly of the TRPP2/PKD1 complex.  
538 *Proceedings of the National Academy of Sciences of the United States of America* *106*, 11558-  
539 11563. 10.1073/pnas.0903684106.  
540 Zheng, W., Cai, R., Hofmann, L., Nesin, V., Hu, Q., Long, W., Fatehi, M., Liu, X., Hussein, S.,  
541 Kong, T., et al. (2018a). Direct Binding between Pre-S1 and TRP-like Domains in TRPP  
542 Channels Mediates Gating and Functional Regulation by PIP2. *Cell reports* *22*, 1560-1573.  
543 10.1016/j.celrep.2018.01.042.  
544 Zheng, W., Shen, F., Hu, R., Roy, B., Yang, J., Wang, Q., Zhang, F., King, J.C., Sergi, C., Liu,  
545 S.M., et al. (2016). Far Upstream Element-Binding Protein 1 Binds the 3' Untranslated Region of  
546 PKD2 and Suppresses Its Translation. *Journal of the American Society of Nephrology : JASN*  
547 *27*, 2645-2657. 10.1681/ASN.2015070836.  
548 Zheng, W., Yang, X., Hu, R., Cai, R., Hofmann, L., Wang, Z., Hu, Q., Liu, X., Bulkley, D., Yu,  
549 Y., et al. (2018b). Hydrophobic pore gates regulate ion permeation in polycystic kidney disease 2  
550 and 2L1 channels. *Nature communications* *9*, 2302. 10.1038/s41467-018-04586-x.

551

## 552 **Figure legends**

553 **Figure 1. Functional regulation of PKD2 by TACAN in *Xenopus* oocytes.** **A.** Representative  
554 current traces obtained using a voltage jump protocol in oocytes expressing TACAN, PKD2  
555 F604P (F604P for short) or F604P + TACAN, in the presence of the divalent-free Na-containing  
556 solution (in mM): 100 NaCl, 2 KCl, 10 HEPES and pH 7.5. Data from water-injected oocytes  
557 served as negative control (Ctrl). **B.** Statistical bar graphs of currents recorded at +80 mV  
558 obtained under the same experimental conditions as in **A**. Data are presented as mean  $\pm$  SEM. N  
559 = 10-11 oocytes. \*  $p < 0.05$ ; \*\*  $p < 0.01$ . **C.** Representative IF images showing oocyte surface  
560 expression of TACAN or F604P. Scale bar, 50  $\mu$ m. **D.** Representative Western blot data of the  
561 biotinylated (surface) and total protein of F604P and TACAN. **E.** Averaged data obtained as  
562 those from **D** (N = 3). Data are presented as mean  $\pm$  SEM. ns, not significant; \*\*\*  $p < 0.001$ . **F.**  
563 Upper panels: representative I-V curves for F604P or F604P + TACAN when 100 mM of an  
564 indicated cation was used in the divalent ion-free bath solution. Lower panel: averaged reversal  
565 potentials. Data are presented as mean  $\pm$  SEM. N = 11 oocytes. ns, not significant. **G** and **H.** Left  
566 panel: representative I-V curves for PKD2 F604P (**G**) and F604P + TACAN (**H**) in bath solution  
567 with or without 1 mM  $\text{Ca}^{2+}$ . Right panel: effect of  $\text{Ca}^{2+}$  on the inward (-80 mV) and outward  
568 (+80 mV) currents for F604P (**G**) and F604P + TACAN (**H**). Data are presented as mean  $\pm$  SEM.  
569 N = 5 oocytes. \*  $p < 0.05$ ; \*\*  $p < 0.01$ ; \*\*\*  $p < 0.001$ .

570 **Figure 2. Effects of TACAN and pressure on PKD2 single-channel parameters in CHO**  
571 **cells.** **A.** Representative single-channel recordings (at +80 mV) of CHO cells with indicated  
572 transfections. The same solution (in mM: 140 NaCl, 5 KCl, 2  $\text{CaCl}_2$ , 2  $\text{MgCl}_2$ , 10 HEPES, 10  
573 glucose, and pH 7.4) was used in the pipette and bath. **B.** Quantified unitary current amplitudes  
574 and open probabilities obtained from **A**. Data are presented as mean  $\pm$  SEM. N = 4-6 cells. \*\*  $p <$   
575  $0.01$ ; \*\*\*  $p < 0.001$ . **C** and **D.** Left panels: representative single-channel recordings (at +80 mV)  
576 in CHO cells transfected with PKD2 (**C**) or PKD2 + TACAN (**D**) showing the effect of negative  
577 pressures. Right panels: effect of the pressure on the unitary currents and normalized open  
578 probabilities of PKD2 (**C**) or PKD2 + TACAN (**D**). Data are presented as mean  $\pm$  SEM. N = 6  
579 cells. ns, not significant; \*\*  $p < 0.01$ .

580 **Figure 3. Effect of TACAN on inactivation of PKD2-mediated currents in oocytes.** **A.**  
581 Representative traces (from three independent experiments) from oocytes expressing PKD2  
582 F604P or F604P + TACAN. Traces obtained from +50 mV to +100 mV were marked blue or  
583 green, as indicated. For clarity, those at +80 mV were compared. **B.** Ratios of the steady currents  
584 ( $I_{\text{steady}}$ ) to the peak currents ( $I_{\text{peak}}$ ) for F604P and F604P + TACAN obtained as in **A** (N = 7  
585 oocytes). **C.** Time constant ( $\tau$ ) of current decay for F604P + TACAN obtained through an  
586 exponential fit (N = 7 oocytes). **D.** Representative traces (from three independent experiments)  
587 from oocytes expressing PKD2 L677G or L677G + TACAN. Traces obtained from +50 mV to  
588 +100 mV are marked blue or green, as indicated. **E.** Left panel: Representative I-V curves from  
589 oocytes expressing L677G or L677G + TACAN. Right panel: averaged currents at +80 mV  
590 obtained from oocytes expressing L677G or L677G + TACAN. Data are presented as  
591 mean  $\pm$  SEM. N = 10 oocytes. \*\*  $p < 0.01$ . **F.** Representative Western blot data of the surface  
592 (biotinylated) and total proteins of L677G and TACAN. **G.** Time constants ( $\tau$ ) of current decay  
593 for L677G and L677G + TACAN (N = 5 oocytes).

594 **Figure 4. Colocalization and association of the endogenous PKD2 and TACAN in renal cell**  
595 **lines.** **A.** Subcellular localization of the endogenous PKD2 and TACAN in MDCK, IMCD and



596 LLC-PK1 cells by means of immunofluorescence. Arl13b served as a primary cilia marker. Scale  
597 bar, 5  $\mu$ m. Shown are representative data from three independent experiments. **B.** Representative  
598 co-IP data (from three independent experiments) showing association between the endogenous  
599 PKD2 and TACAN in MDCK, IMCD and LLC-PK1 cells.

600 **Figure 5. Domains of TACAN mediating association with PKD2.** **A** and **B.** Representative co-  
601 IP data (from three independent experiments) showing the interaction between PKD2 mutant  
602 HA-F604P and Flag-TACAN using Flag antibody (**A**) or PKD2 antibody (**B**) for precipitation.  
603 **C.** Representative co-IP data (from three independent experiments) showing interaction between  
604 WT HA-PKD2 and Flag-TACAN using Flag antibody for precipitation. **D.** Left panels:  
605 representative co-IP data (from three independent experiments) showing the interaction between  
606 mutant HA-F604P and an indicated TACAN truncation mutant using Flag antibody for  
607 precipitation. Right panel: topology of human TACAN. Indicated residue numbers stand for  
608 points of truncation mutations. **E.** Representative I-V curves and averaged currents at +80 mV in  
609 oocytes expressing F604P with or without a TACAN truncation mutant. Data are presented as  
610 mean  $\pm$  SEM. N = 7-20 oocytes. \* p < 0.05; \*\* p < 0.01; \*\*\* p < 0.001.

611 **Figure 6. Domains in PKD2 mediating association with TACAN.** **A.** Left panels:  
612 representative co-IP data (from three independent experiments) showing the interaction between  
613 GFP-PKD2 and HA-TACAN using HA antibody for precipitation. Non-transfected and GFP-  
614 transfected CHO cell lysates served as negative controls. Right panel: binding strength averaged  
615 from three independent experiments. **B.** Left panels: representative co-IP data (from three  
616 independent experiments) showing the interaction between Flag-TACAN and a PKD2 truncation  
617 mutant (A594X or N580-L700) using Flag antibody for precipitation. PKD2 expressed in  
618 oocytes with or without co-expressed Flag-TACAN served as positive and negative controls,  
619 respectively. Right panel: topology of human PKD2. Indicated residue numbers stand for points  
620 of truncation mutations. **C.** Representative co-IP data (from three independent experiments)  
621 showing the interaction between PKD2 mutant A594X and TACAN mutant L296-D343, and  
622 between PKD2 mutant N580-L700 and TACAN mutant K160X using Flag antibody for  
623 precipitation. PKD2 mutants A594X and N580-L700 alone served as negative controls.

624 **Figure 7. Effect of the TACAN N-terminus on TACAN's inhibition of the PKD2 function.**  
625 **A.** Left panel: representative co-IP data showing the interaction between F604P and Flag-  
626 TACAN, with or without TACAN N-terminus (K135X) in oocytes, using PKD2 antibody for  
627 precipitation. Right panel: binding strength averaged from three independent experiments. **B.**  
628 Upper panel: representative I-V curves from oocytes expressing F604P, F604P + TACAN, or  
629 F604P + TACAN + K135X. Lower panel: averaged currents at +80 mV. Data are presented as  
630 mean  $\pm$  SEM. N = 9-12 oocytes. ns, not significant, \*\*\* p < 0.001.

631 **Figure 8. Effect of TACAN on the tail curling and pronephric cystogenesis of larval**  
632 **zebrafish.** **A.** Left panel: schematic presentation of the PKD2 protein/gene domain architecture  
633 and CRISPR target sites. The gene loci are shown with exons (gray boxes) and introns (solid  
634 lines). The position of the CRISPR target sites in exon 1 in the PKD2 gene and the  
635 corresponding PKD2 protein (black box) are indicated by the dash lines, and the predicted  
636 remaining (truncated) PKD2 protein (PKD2 CRISPR) is indicated. Right panel: sequencing of  
637 PKD2 in the Ctrl and PKD2 CRISPR fish at 3 dpf. Red lines indicate CRISPR target sites. **B.**  
638 Upper panel: PKD2 protein detected by Western blot under the Ctrl (water injection) and



639 CRISPR-directed PKD2 knockdown (KD) conditions (PKD2 sgRNA 200 pg + Cas9 300 pg) at 3  
640 dpf. Lower panels: representative pictures of embryos at 3 dpf. **C.** Representative pictures  
641 showing tails of 3 dpf zebrafish under the Ctrl, TACAN overexpression (OE) (by injection of  
642 mRNA at 100 pg each), or PKD2 KD condition (PKD2 sgRNA 100 pg + Cas9 200 pg). **D.**  
643 Average percentages of fish displaying curled tail under different conditions. Data were from  
644 three independent experiments with the indicated total numbers of embryos. ns, not significant,  
645 \*\*\*  $p < 0.001$ . **E.** Representative western blot data (from three independent experiments)  
646 showing the expression of PKD2 and TACAN. **F.** Representative pictures of a 3-dpf embryo with  
647 PKD2 KD plus TACAN OE, showing pronephric cyst formation (red box and arrow). Ctrl fish  
648 was injected with water only. Cyst formation was also indicated by a histologic section showing  
649 dilated pronephric tubules (asterisks). G, glomerulus; Pt, pronephric tubule. **G.** Averaged  
650 percentages of embryos exhibiting pronephric cysts under the indicated conditions. Data are  
651 presented as mean  $\pm$  SEM. \*\*\*  $p < 0.001$ .  
652

## Fig 1

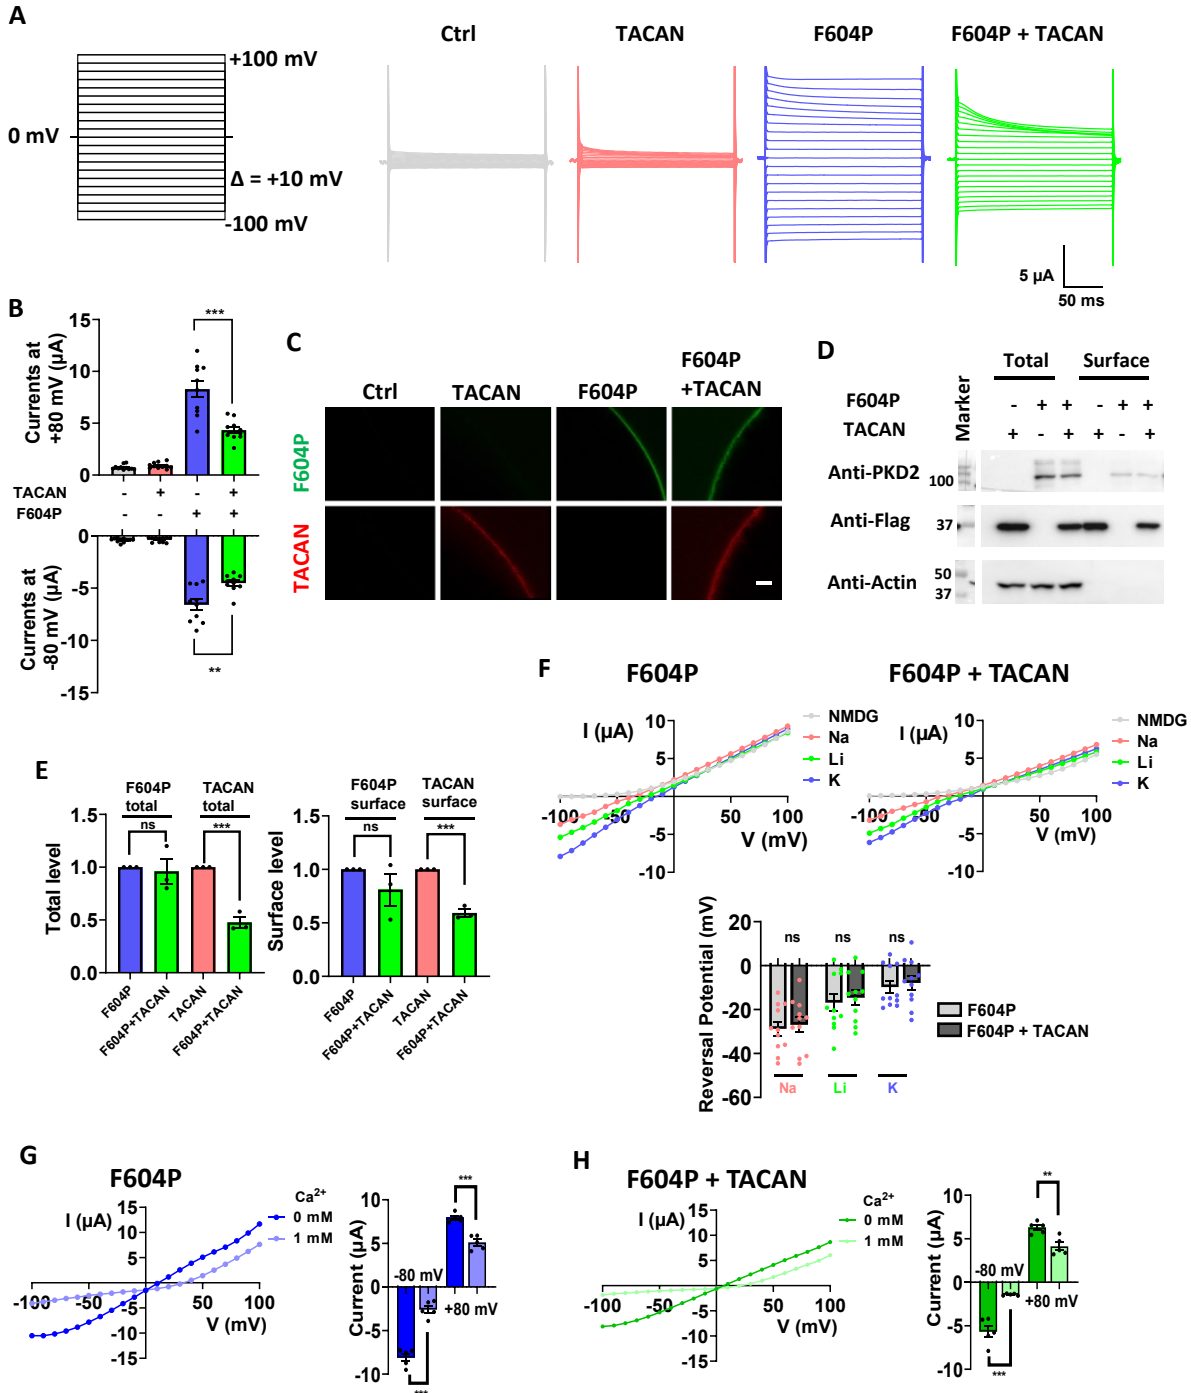

653  
654

**Fig 2**

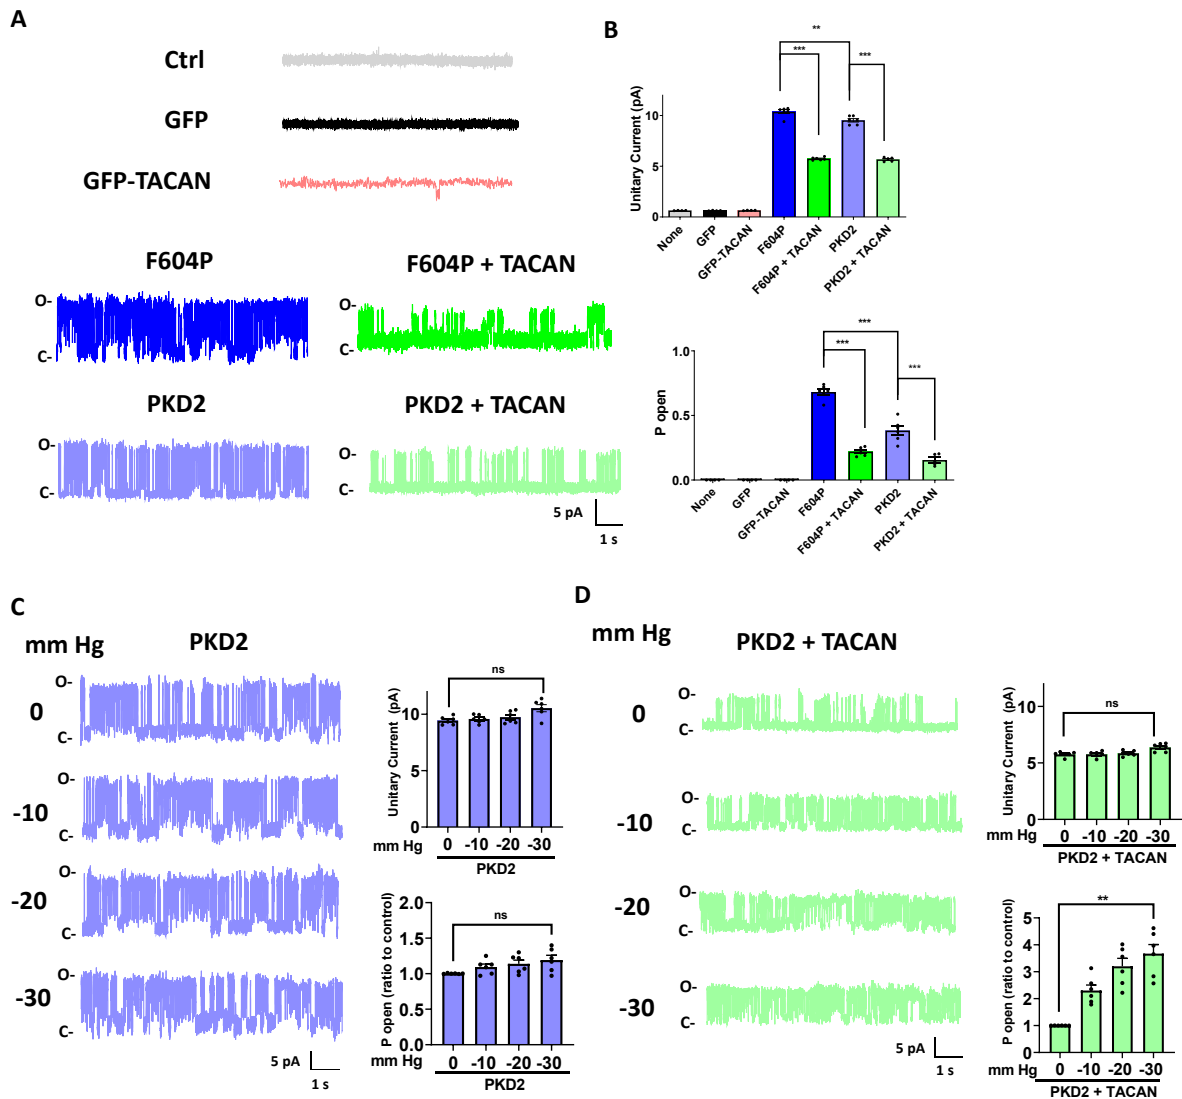

655  
656

**Fig 3**

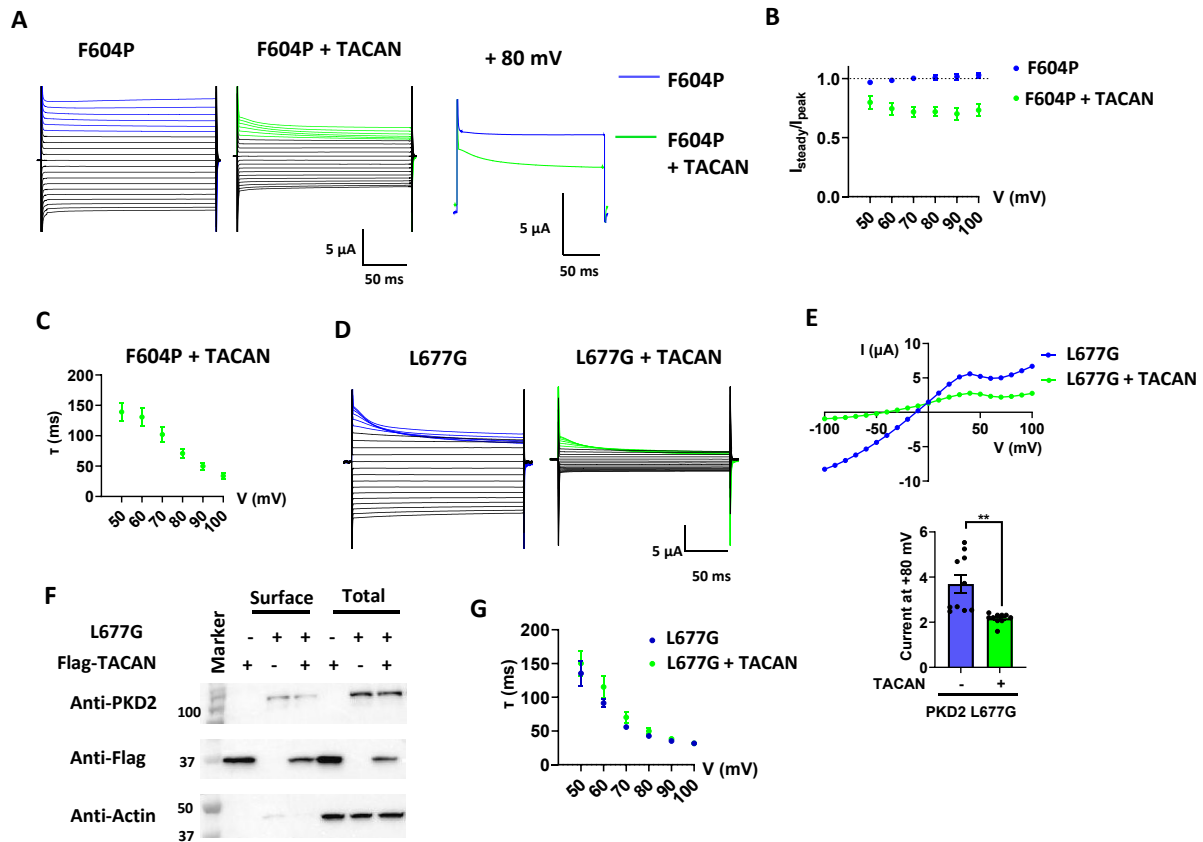

657  
658

## Fig 4

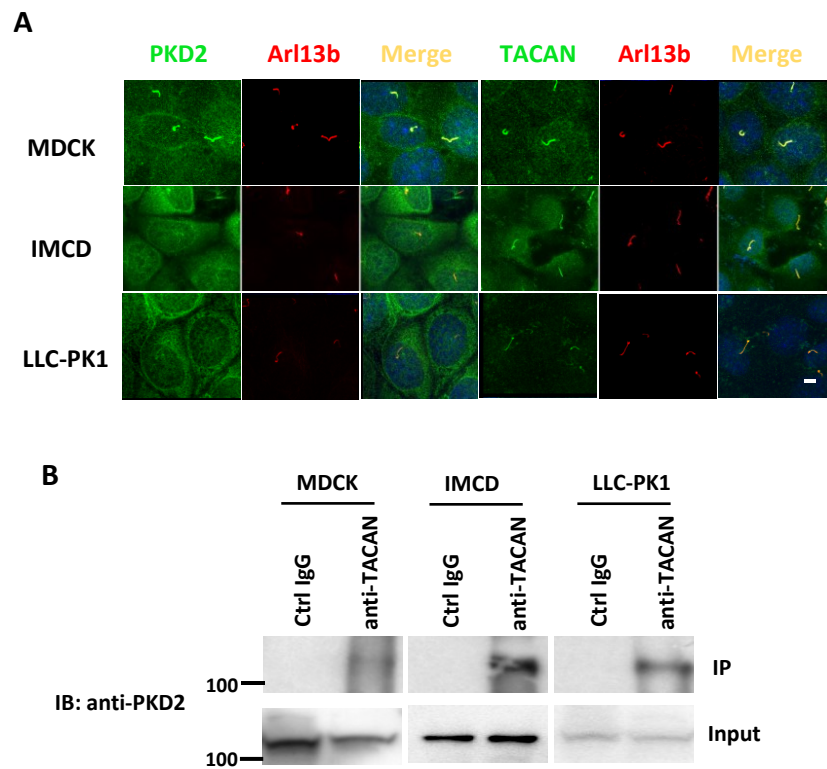

659  
660



## Fig 5

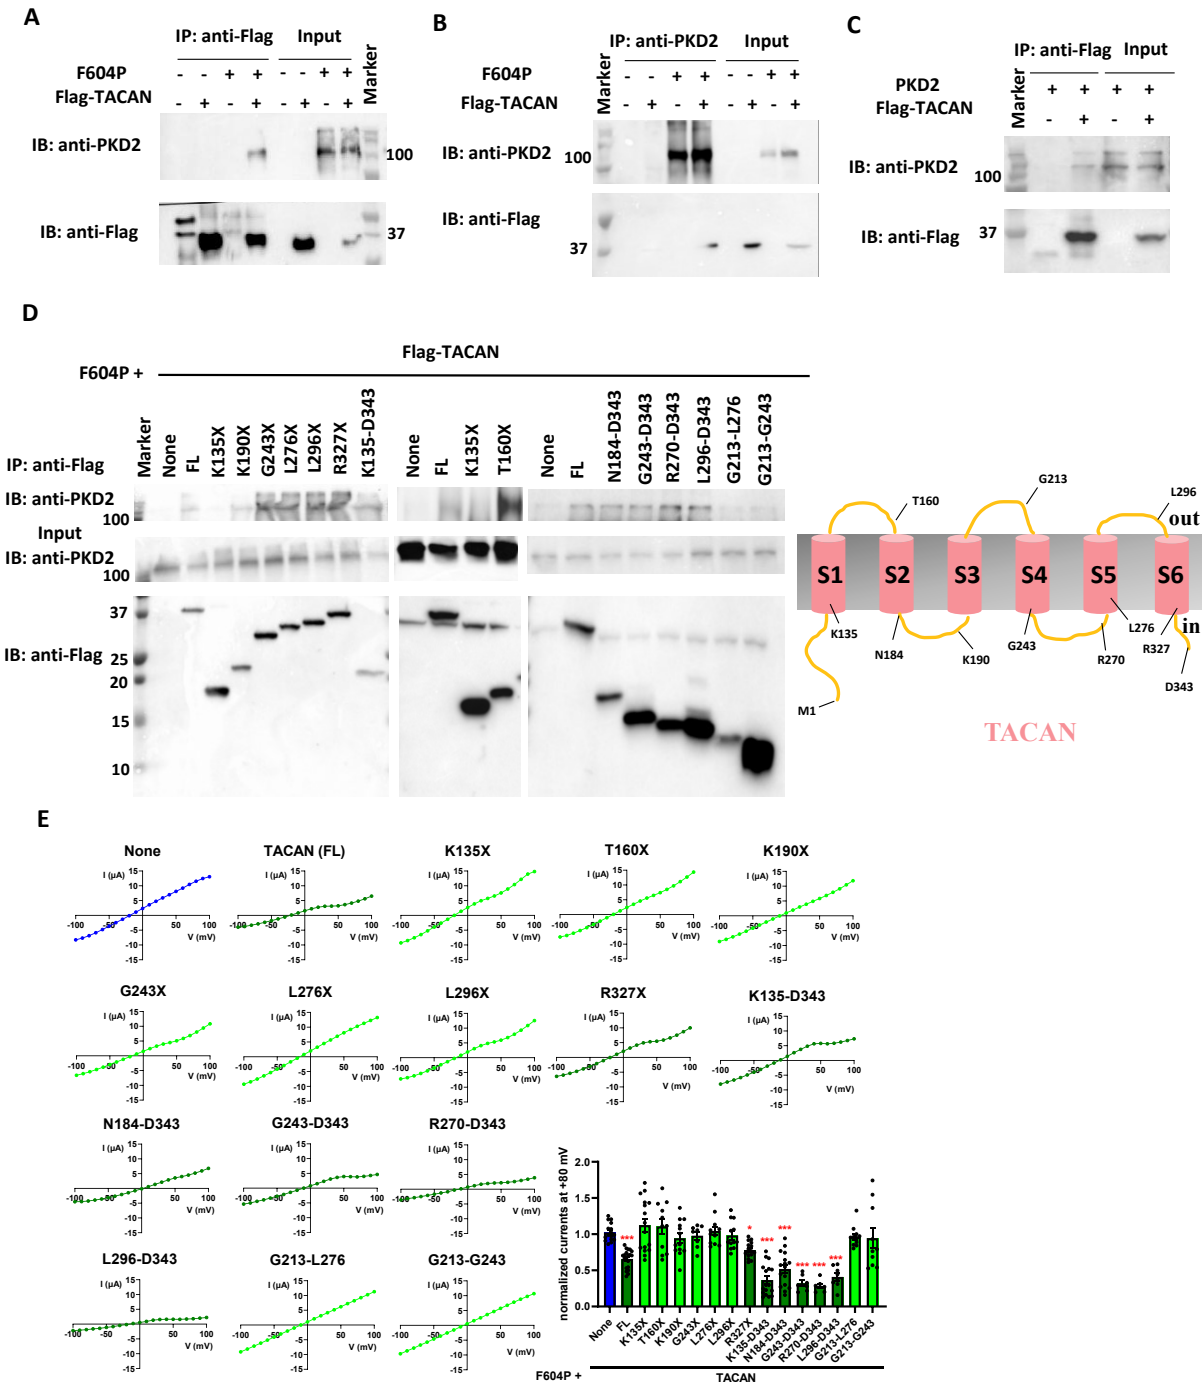

661  
662

## Fig 6

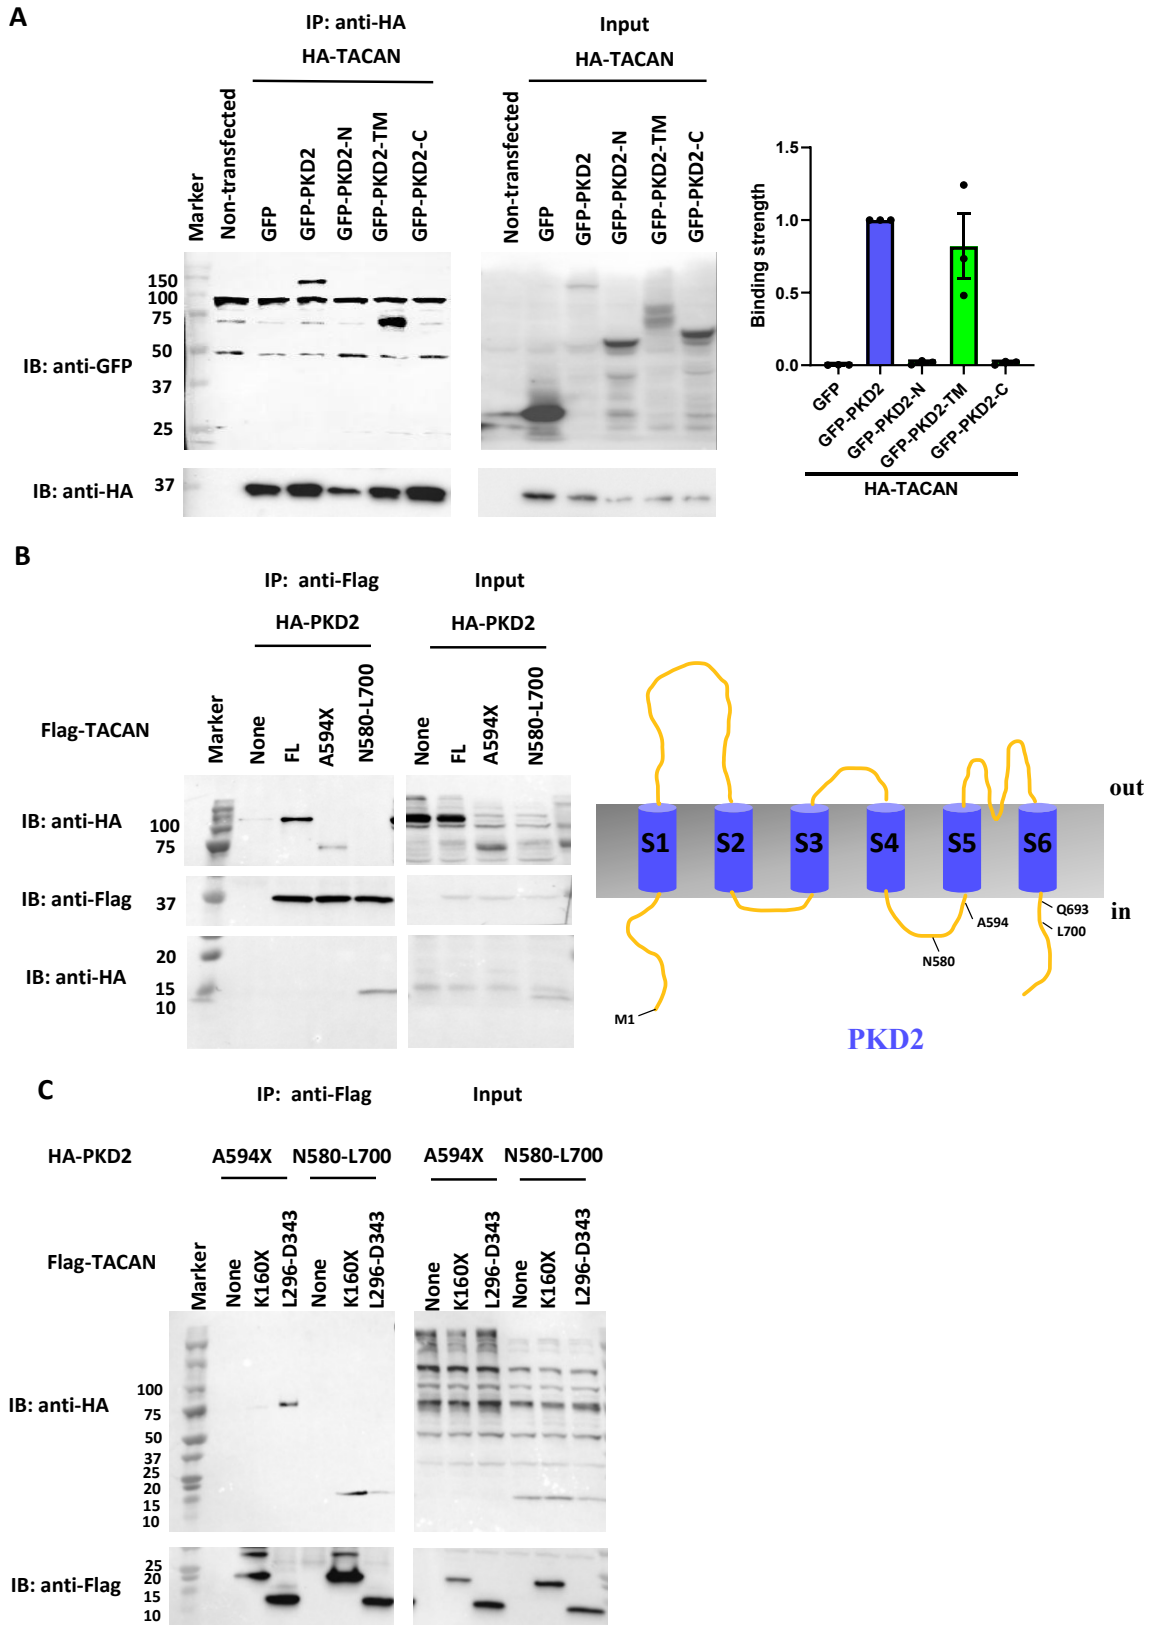

## Fig 7

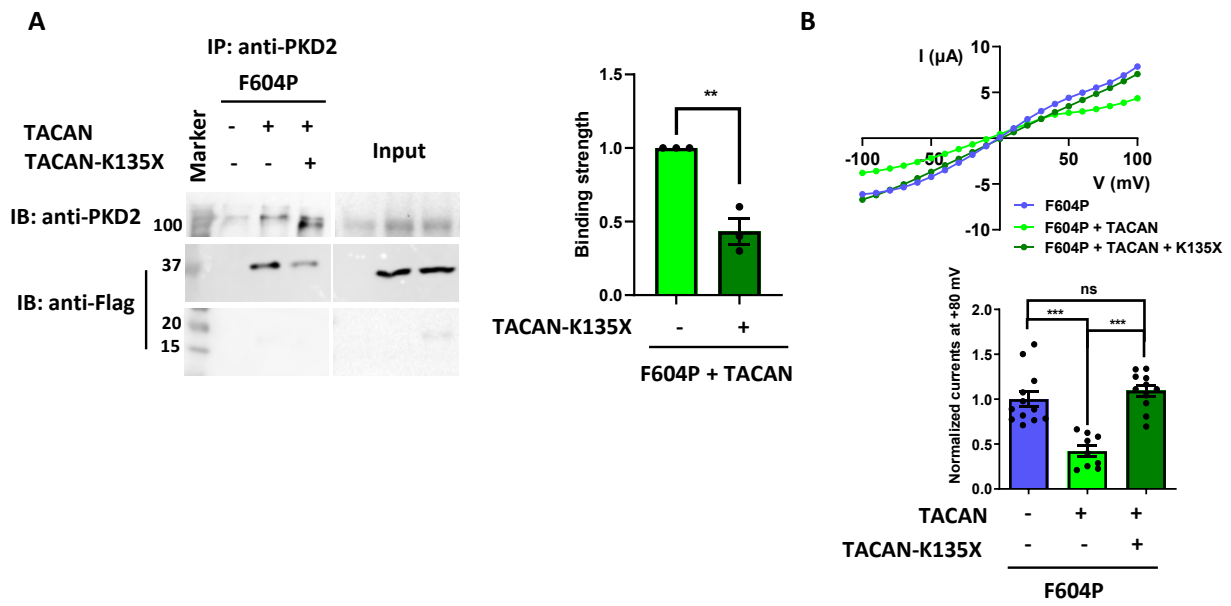

664

665

## Fig 8

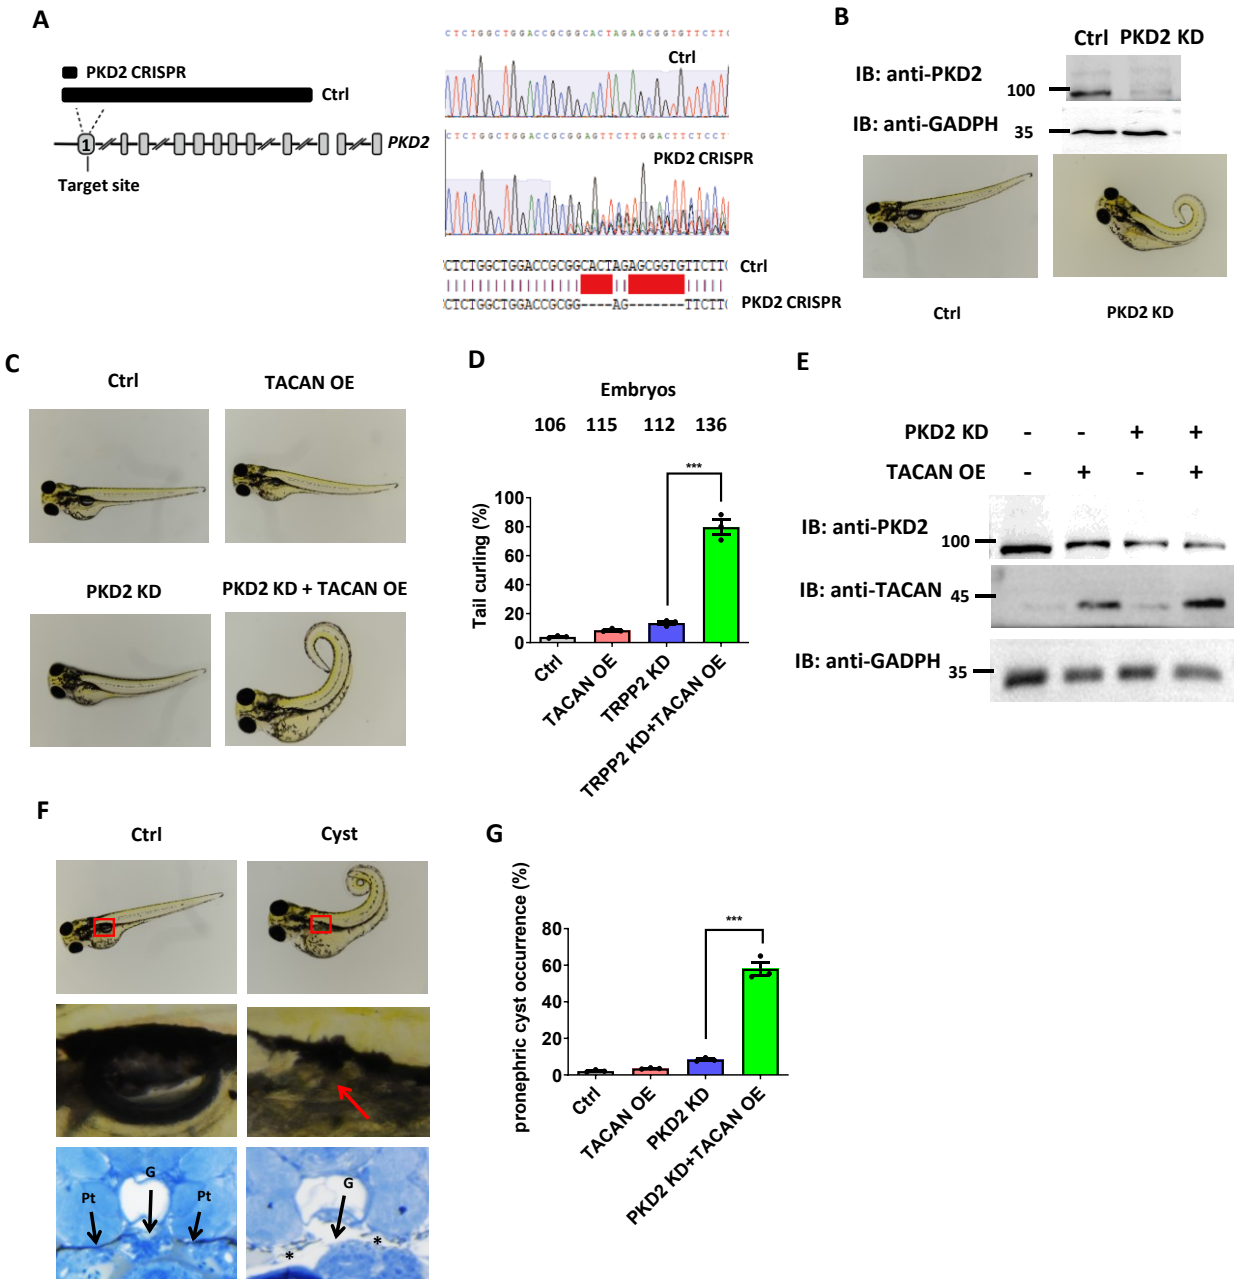

666

667

## Fig S1

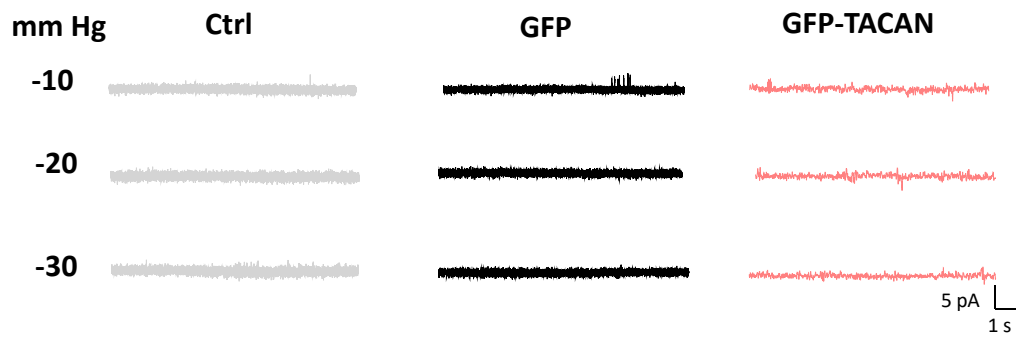

668

669 **Figure S1. Channel activity of TACAN in CHO cells under negative pressures, related to**  
670 **Figure 2.** Representative single channel recordings in CHO cells transfected with none (Ctrl),  
671 GFP or GFP-TACAN, in the presence of a negative pressure, as indicated.



## Fig S2

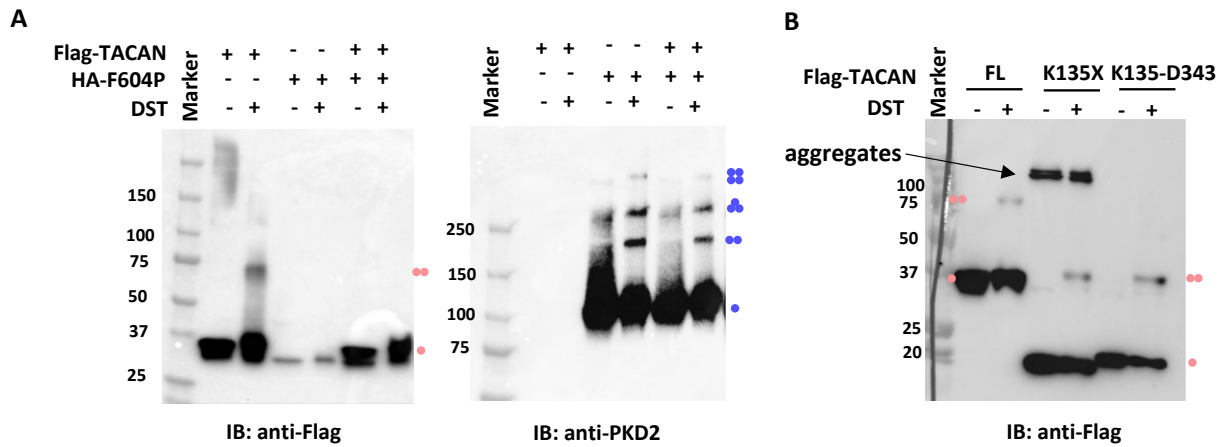

672

673 **Figure S2. Oligomerization of TACAN and PKD2 F604P, related to Figure 5. A.** Western  
 674 blot data obtained in the presence of cross-linking, showing expression of TACAN and PKD2  
 675 F604P. Cross-linking was carried out with 1 mM disuccinimidyl tartrate (DST). Putative subunit  
 676 composition of the bands is indicated. B. Western blot data obtained in the presence of cross-  
 677 linking, showing expression of TACAN FL, K135X, and K135X-D343. Putative oligomer  
 678 conditions are indicated.

679
